# Supplementary material
Source: Springer Nature journal article supplement (https://www.springermedizin.de/resource/supplementary/12936_2010_1676_MOESM3_ESM.pdf/9542318)

### *glurp*-Burkina Faso

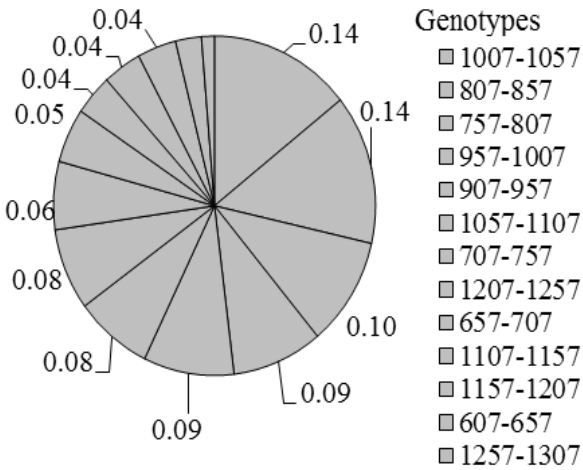

### *glurp* - São Tomé

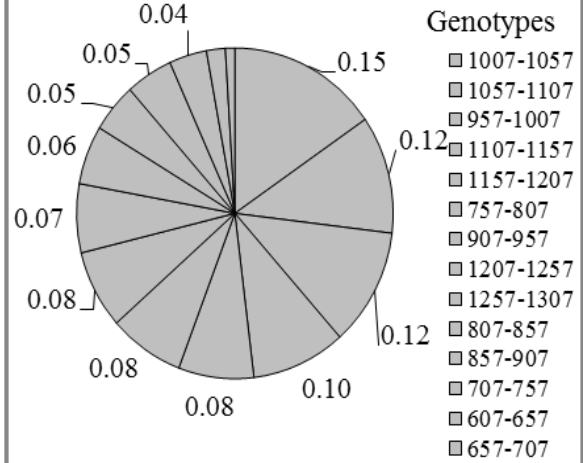

### *glurp* - Malawi

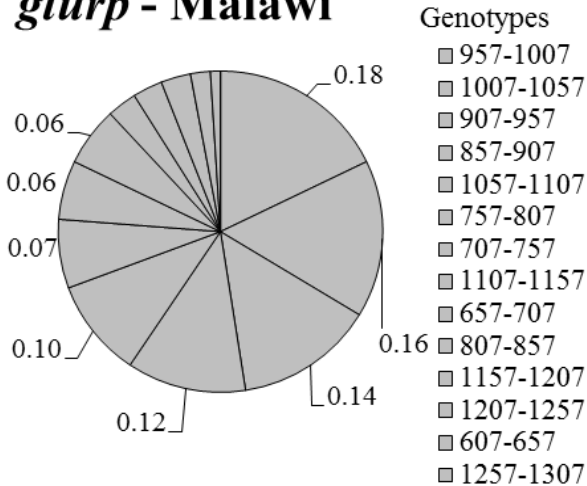

### *glurp* - Tanzania

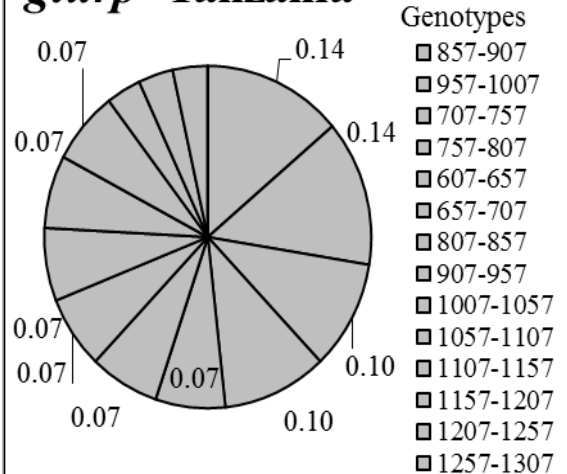

### *glurp* - Uganda

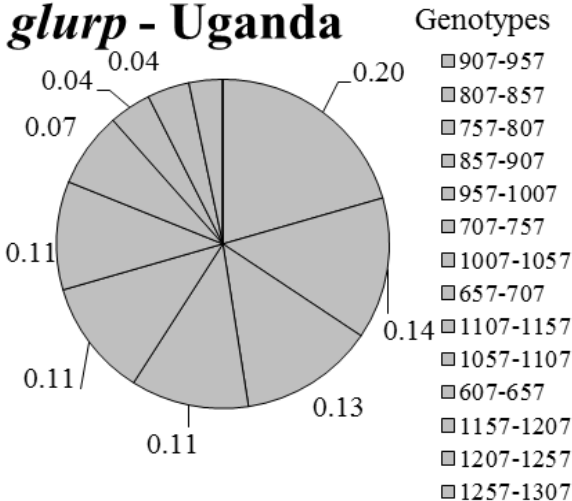

Figure 3

Supplement: MOESM3 [file 9542318]
